# Supplementary material for: Occurrence, Distribution, and Ecological Risk Assessment of Antibiotics in Different Environmental Media in Anqing, Anhui Province, China
Source: MDPI journal article supplement (doi:10.3390/ijerph18158112), 2021-07-30
Supplement: s1 [file s1]

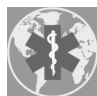

Article

# Occurrence, Distribution, and Ecological Risk Assessment of Antibiotics in Different Environmental Media in Anqing, Anhui Province, China

Haiying Chen <sup>1,2</sup>, Wenfang Zheng<sup>1,\*</sup> and Xiaoming Shen <sup>2</sup>, Fei Zhang <sup>2</sup>, Xiaoping Zhou <sup>2</sup>, Jialin Shen <sup>2</sup> and Ming Lu <sup>1,\*</sup>

<sup>1</sup> School of Chemical Engineering, Nanjing University of Science and Technology, Nanjing 210094, China; chaiying@mail.cgs.gov.cn

<sup>2</sup> Nanjing Center, China Geological Survey, Nanjing 210016, China; shenxiaoming@mail.cgs.gov.cn (X.S.); zfei@mail.cgs.gov.cn (F.Z.); zxiaoping@mail.cgs.gov.cn (X.Z.); sjialin@mail.cgs.gov.cn (J.S.)

\* Correspondence: zhwf@njjust.edu.cn (W.Z.); luming@njjust.edu.cn (M.L.)

**Citation:** Chen, H.; Zheng, W.; Shen, X. Occurrence, Distribution, and Ecological Risk Assessment of Antibiotics in Different Environmental Media in Anqing, Anhui Province, China. *Int. J. Environ. Res. Public Health* **2021**, *18*, 8112. <https://doi.org/10.3390/ijerph18158112>

Academic Editors: Giulia Simonetti, Francesca Buiairelli and Paul B. Tchounwou

Received: 28 June 2021

Accepted: 23 July 2021

Published: 30 July 2021

**Publisher's Note:** MDPI stays neutral with regard to jurisdictional claims in published maps and institutional affiliations.

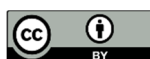

**Copyright:** © 2021 by the authors. Licensee MDPI, Basel, Switzerland. This article is an open access article distributed under the terms and conditions of the Creative Commons Attribution (CC BY) license (<http://creativecommons.org/licenses/by/4.0/>).

**Table S1.** Basic information of the studied regions of Anqing in 2020.

| Section            | Area<br>(Km <sup>2</sup> ) | Population<br>of the<br>year end<br>(10 <sup>4</sup> persons) | Population<br>density<br>(person<br>/km <sup>2</sup> ) | Urbanization<br>(%) | Output<br>Value<br>of<br>agriculture<br>(10 <sup>4</sup> yuan) | Output<br>Value<br>of<br>Forestry<br>(10 <sup>4</sup> yuan) | Output<br>value<br>of<br>animal husbandry<br>(10 <sup>4</sup> yuan) | Output<br>value<br>of<br>fishery<br>(10 <sup>4</sup> yuan) |
|--------------------|----------------------------|---------------------------------------------------------------|--------------------------------------------------------|---------------------|----------------------------------------------------------------|-------------------------------------------------------------|---------------------------------------------------------------------|------------------------------------------------------------|
| Anqing             | 13538                      | 472.3                                                         | 349                                                    | 50.0                | 1607723                                                        | 357004                                                      | 1153133                                                             | 636765                                                     |
| Yingjiang District | 207                        | 27.7                                                          | 1338                                                   | 87.0                | 24143                                                          | 331                                                         | 4956                                                                | 5441                                                       |
| Daguan District    | 235.5                      | 29.5                                                          | 1253                                                   | 67.7                | 51813                                                          | 4902                                                        | 35125                                                               | 32166                                                      |
| Yixiu District     | 414                        | 28.2                                                          | 681                                                    | 46.9                | 38170                                                          | 10462                                                       | 36356                                                               | 49035                                                      |

Note: Data from Anqing and three urban districts, and all data were obtained and calculated from Anqing Statistical Yearbook, 2020. (<http://tjj.anqing.gov.cn/tjsj/tjnj/index.html>).

**Table S2.** Administrative region information and types of land of sampling sites.

| Sampling No. | Sampling sites      | Types of land     | Administrative region                           |
|--------------|---------------------|-------------------|-------------------------------------------------|
| S1           | agricultural land   | agricultural area | Haikou Town,Daguan District                     |
| S2           | upstream            | rural area        | Juwang Village, Haikou Town, Daguan District    |
| S3           | fish pond           | agricultural area | Haikou Town, Daguan District                    |
| S4           | tributaries         | rural area        | Yisheng Village, Haikou Town,Daguan District    |
| S5           | farm                | rural area        | Hongsheng Village, Haikou Town, Daguan District |
| S6           | downstream          | industrial area   | High-tech Zone, Daguan District                 |
| S7           | near chemical plant | industrial area   | High-tech Zone, Daguan District                 |
| S8           | near WWTP           | urban area        | Yingjiang District                              |
| S9           | orchard             | scenic spot       | Dalongshan town, Yixiu District                 |
